# Supplementary material for: A validated LC-MS/MS assay for quantification of 24(S)-hydroxycholesterol in plasma and cerebrospinal fluid
Source: PubMed Central journal article supplement (PMC4442878; doi:10.1194/jlr.d058487), 2015-06
Supplement: supp_D058487_jlr.D058487-1.pdf [file supp_D058487_jlr.D058487-1.pdf]

**Supplementary Table S1.** Parameters of standard curves prepared in surrogate and authentic matrixes

| Matrix                           | Slope | Intercept | R      |
|----------------------------------|-------|-----------|--------|
| 5% BSA (Surrogate)               | 0.145 | 0.000163  | 0.9978 |
| Plasma (Authentic)               | 0.145 | 0.125     | 0.9991 |
| 2.5% HP- $\beta$ -CD (Surrogate) | 0.428 | 0.00168   | 0.9978 |
| CSF (Authentic)                  | 0.456 | 0.116     | 0.9963 |

**Supplementary Table S2.** Branching ratio of plasma and highest standard (ULOQ) in methanol

| Matrix | Sample         | Branching ratio | % Difference from ULOQ |
|--------|----------------|-----------------|------------------------|
| Plasma | Plasma-1       | 24.33           | -5.8                   |
|        | Plasma-2       | 24.57           | -4.9                   |
|        | Plasma-3       | 23.81           | -7.9                   |
|        | Plasma-4       | 25.22           | -2.4                   |
|        | Plasma-5       | 26.15           | 1.2                    |
|        | Plasma-6       | 27.56           | 6.7                    |
|        | ULOQ of plasma | 25.84           | 0                      |
| CSF    | CSF-1          | 23.7            | -7.9                   |
|        | CSF-2          | 24.43           | -5.1                   |
|        | CSF-3          | 24.92           | -3.2                   |
|        | CSF-4          | 27.15           | 5.5                    |
|        | CSF-5          | 24.23           | -5.9                   |
|        | CSF-6          | 25.91           | 0.7                    |
|        | ULOQ of CSF    | 25.74           | 0                      |

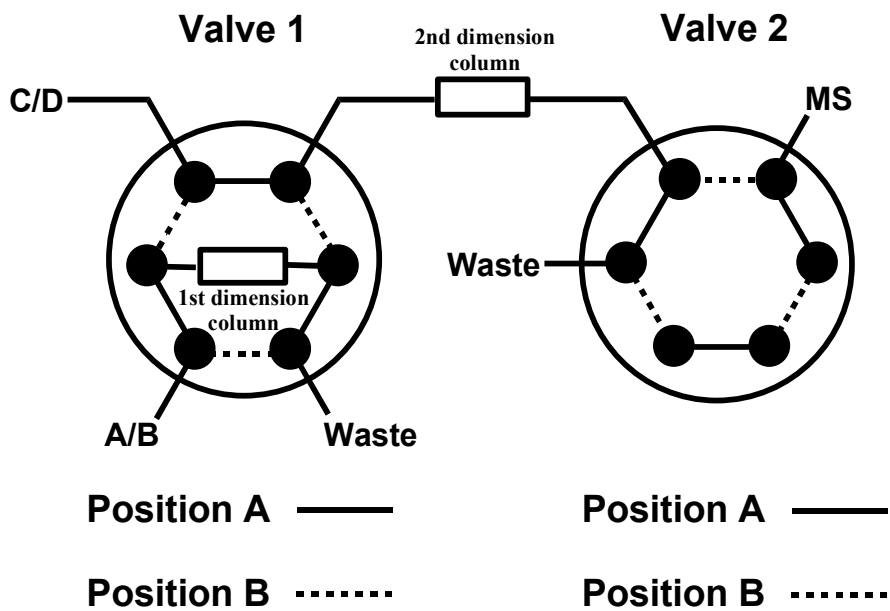

Supplementary Figure S1. Schematic representation of the 2D-LC-MS/MS system.
